# Supplementary material
Source: Elsevier journal article supplement (https://www.sciencedirect.com/science/article/pii/S1699258X20301601)
Supplement: mmc1 [file S1699258X20301601:mmc1.pdf]

**Tabla 1 suplementaria.** Percepción de la utilidad de los SYSADOA orales, según características del paciente y la AO

| Desenlace                                                                                                                           | Respuesta  | Porcentaje |
|-------------------------------------------------------------------------------------------------------------------------------------|------------|------------|
| <b>Características fenotípicas que condicionan el uso de SYSADOA</b>                                                                |            |            |
| Pacientes < 40 años                                                                                                                 | De acuerdo | 86,7%      |
| Mujeres < 40 años                                                                                                                   | De acuerdo | 80,0%      |
| Pacientes con sobrepeso (IMC 25-29,9)                                                                                               | De acuerdo | 86,7%      |
| Pacientes que realizan tareas domésticas de esfuerzo/repetición                                                                     | De acuerdo | 80,0%      |
| Pacientes con traumatismos previos                                                                                                  | De acuerdo | 86,7%      |
| Pacientes con cirugía traumatológica previa                                                                                         | De acuerdo | 80,0%      |
| <b>Tipo de AO en la que es más adecuado el uso de SYSADOA, según criterios de prescripción utilizados en la PCH</b>                 |            |            |
| Primaria y secundaria                                                                                                               | Adecuado   | 80,0%      |
| <b>Tipo de AO en la que es más adecuado el uso de SYSADOA, según clasificación radiológica de Kellgren y Lawrence <sup>16</sup></b> |            |            |
| Grado 1                                                                                                                             | Adecuado   | 93,3%      |
| Grado 2                                                                                                                             | Adecuado   | 100,0%     |

|                                                                                                                                  |             |        |
|----------------------------------------------------------------------------------------------------------------------------------|-------------|--------|
| Grado 3                                                                                                                          | Adecuado    | 86,7%  |
| Grado 4                                                                                                                          | No adecuado | 86,7%  |
| <b>Tipo de AO en la que es más adecuado el uso de SYSADOA, según criterios clasificatorios de Herrero-Beaumont <sup>17</sup></b> |             |        |
| Tipo I                                                                                                                           | Adecuado    | 86,7%  |
| Tipo II                                                                                                                          | Adecuado    | 86,7%  |
| Tipo III                                                                                                                         | Adecuado    | 80,0%  |
| <b>Uso de los SYSADOA, según el grado de dolor del paciente</b>                                                                  |             |        |
| Leve – moderado                                                                                                                  | Adecuado    | 100,0% |
| Grave                                                                                                                            | Adecuado    | 80,0%  |
| <b>Uso de los SYSADOA, según la localización de la AO primaria</b>                                                               |             |        |
| Rodilla femorotibial interna                                                                                                     | Adecuado    | 100,0% |
| Rodilla femorotibial externa                                                                                                     | Adecuado    | 100,0% |
| Rodilla femoropatelar                                                                                                            | Adecuado    | 93,3%  |
| Manos - articulaciones IFP y IFD                                                                                                 | Adecuado    | 93,3%  |
| Rizartrosis                                                                                                                      | Adecuado    | 86,7%  |
| Erosiva de manos                                                                                                                 | No adecuado | 80,0%  |
| Hombro                                                                                                                           | No adecuado | 93,3%  |
| Cadera                                                                                                                           | Adecuado    | 80,0%  |
| Columna                                                                                                                          | No adecuado | 86,7%  |
| Tobillo                                                                                                                          | No adecuado | 86,7%  |
| <b>Uso de los SYSADOA, según el tipo de AO secundaria*</b>                                                                       |             |        |
| Secundaria traumática                                                                                                            | De acuerdo  | 93,3%, |

|                                                                           |               |       |
|---------------------------------------------------------------------------|---------------|-------|
| Secundaria con trastornos de alineación                                   | De acuerdo    | 73,3% |
| Secundaria microcristalina                                                | En desacuerdo | 73,3% |
| Secundaria a enfermedad inmunomediada de base                             | En desacuerdo | 86,7% |
| <b>Uso de los SYSADOA en pacientes con prótesis</b>                       |               |       |
| Pacientes con prótesis y que siguen padeciendo AO en otras localizaciones | Adecuado      | 86,7% |
| Pacientes a la espera de una prótesis.                                    | Adecuado      | 80,0% |

\*Se entiende como utilidad el papel de los SYSADOA orales en el contexto del plan terapéutico

AO: artrosis, IFD: articulaciones interfalángicas distales, IFP: articulaciones interfalángicas proximales, IMC: índice de masa corporal, PCH: práctica clínica habitual, SYSADOA: del inglés, Symptomatic Slow-Acting Drugs for Osteoarthritis.

**Tabla 2 suplementaria.** Evaluación del régimen terapéutico y posología de los SYSADOA orales

| Desenlace                | Respuesta | Porcentaje |
|--------------------------|-----------|------------|
| <b>Dosis terapéutica</b> |           |            |
| CS                       | 800 mg    | 86,7%      |
| G                        | 1500 mg   | 100,0%     |

|                               |                                       |               |
|-------------------------------|---------------------------------------|---------------|
| CS/G                          | 800 mg + 1500 mg                      | 66,7%         |
| D                             | 50 mg                                 | 53,3%         |
| <b>Dosis de inicio</b>        |                                       |               |
| CS                            | 800 mg                                | 86,7%         |
| G                             | 1500 mg                               | 100,0%        |
| D                             | 50 mg                                 | 93,3%         |
| <b>Régimen de tratamiento</b> |                                       |               |
| CS                            | Con intervalos de descanso (2 meses)  | 66,7%         |
| G                             | Con intervalos de descanso            | 60,0%         |
| CS/G                          | Con intervalos de descanso            | 53,3%         |
| D                             | Continuo / con intervalos de descanso | 46,7% / 46,7% |

CS: condroitín sulfato, CS/G: combinación de condroitín sulfato y glucosamina, D: diacereína, G: glucosamina

**Tabla 3 suplementaria.** Evaluación del uso de los SYSADOA orales, según comorbilidades y polimedicación de los pacientes.

| <b>Desenlace</b>                                                                                                      | <b>Respuesta</b> | <b>Acuerdo</b> |
|-----------------------------------------------------------------------------------------------------------------------|------------------|----------------|
| <b>Las comorbilidades pueden hacer variar el plan terapéutico</b>                                                     | Sí               | 86,7%          |
| <b>La edad de los pacientes con comorbilidades puede condicionar la decisión terapéutica</b>                          | Sí               | 86,7%          |
| <b>Utilidad como recurso terapéutico en pacientes con comorbilidades y polimedicados, dado su perfil de seguridad</b> |                  |                |

|                                                                                                         |               |        |
|---------------------------------------------------------------------------------------------------------|---------------|--------|
| CS                                                                                                      | De acuerdo    | 93,3%  |
| G                                                                                                       | De acuerdo    | 86,7%  |
| CS/G                                                                                                    | De acuerdo    | 93,3%  |
| D                                                                                                       | De acuerdo    | 53,3%  |
| <b>Prescripción en pacientes con ECV</b>                                                                |               |        |
| CS                                                                                                      | De acuerdo    | 86,7%  |
| G                                                                                                       | De acuerdo    | 93,3%  |
| CS/G                                                                                                    | De acuerdo    | 86,7%  |
| D                                                                                                       | De acuerdo    | 100,0% |
| <b>Prescripción en pacientes con RCV</b>                                                                |               |        |
| CS                                                                                                      | De acuerdo    | 93,3%  |
| G                                                                                                       | De acuerdo    | 93,3%  |
| CS/G                                                                                                    | De acuerdo    | 93,3%  |
| D                                                                                                       | De acuerdo    | 100,0% |
| <b>Prescripción en pacientes con enfermedad digestiva</b>                                               |               |        |
| CS                                                                                                      | De acuerdo    | 86,7%  |
| G                                                                                                       | De acuerdo    | 86,7%  |
| CS/G                                                                                                    | De acuerdo    | 86,7%  |
| D                                                                                                       | De acuerdo    | 73,3%  |
| <b>Prescripción en pacientes con enfermedad hepática, independientemente del grado de la enfermedad</b> |               |        |
| D                                                                                                       | En desacuerdo | 80,0%  |
| <b>Prescripción en pacientes con enfermedad hepática compensada</b>                                     |               |        |
| CS                                                                                                      | En desacuerdo | 60,0%  |

|                                                                                                            |               |       |
|------------------------------------------------------------------------------------------------------------|---------------|-------|
| G                                                                                                          | En desacuerdo | 73,3% |
| CS/G                                                                                                       | En desacuerdo | 66,7% |
| <b>Prescripción en pacientes con enfermedad hepática con funcionalidad significativamente comprometida</b> |               |       |
| CS                                                                                                         | En desacuerdo | 80,0% |
| G                                                                                                          | En desacuerdo | 86,7% |
| CS/G                                                                                                       | En desacuerdo | 86,7% |
| <b>Prescripción en pacientes con enfermedad hepática descompensada</b>                                     |               |       |
| CS                                                                                                         | En desacuerdo | 80,0% |
| G                                                                                                          | En desacuerdo | 80,0% |
| CS/G                                                                                                       | En desacuerdo | 86,7% |
| <b>Prescripción en pacientes con enfermedad renal, independientemente del grado de la enfermedad</b>       |               |       |
| D                                                                                                          | En desacuerdo | 80,0% |
| <b>Prescripción en pacientes con enfermedad renal leve</b>                                                 |               |       |
| CS                                                                                                         | En desacuerdo | 80,0% |
| G                                                                                                          | En desacuerdo | 73,3% |
| CS/G                                                                                                       | En desacuerdo | 73,3% |
| <b>Prescripción en pacientes con enfermedad renal moderada</b>                                             |               |       |
| CS                                                                                                         | En desacuerdo | 86,7% |
| G                                                                                                          | En desacuerdo | 86,7% |
| CS/G                                                                                                       | En desacuerdo | 86,7% |
| <b>Prescripción en pacientes con enfermedad renal descompensada</b>                                        |               |       |
| CS                                                                                                         | En desacuerdo | 86,7% |

|                                                                     |               |       |
|---------------------------------------------------------------------|---------------|-------|
| G                                                                   | En desacuerdo | 86,7% |
| CS/G                                                                | En desacuerdo | 86,7% |
| <b>Prescripción en pacientes con HTA</b>                            |               |       |
| CS                                                                  | De acuerdo    | 93,3% |
| G                                                                   | De acuerdo    | 93,3% |
| CS/G                                                                | De acuerdo    | 93,3% |
| D                                                                   | De acuerdo    | 93,3% |
| <b>Prescripción en pacientes con dislipidemia</b>                   |               |       |
| CS                                                                  | De acuerdo    | 93,3% |
| G                                                                   | De acuerdo    | 93,3% |
| CS/G                                                                | De acuerdo    | 93,3% |
| D                                                                   | De acuerdo    | 80,0% |
| <b>Prescripción en pacientes con enfermedad vascular periférica</b> |               |       |
| CS                                                                  | De acuerdo    | 86,7% |
| G                                                                   | De acuerdo    | 86,7% |
| CS/G                                                                | De acuerdo    | 93,3% |
| D                                                                   | De acuerdo    | 93,3% |
| <b>Prescripción en pacientes con DM2</b>                            |               |       |
| CS                                                                  | De acuerdo    | 86,7% |
| G                                                                   | De acuerdo    | 80,0% |
| CS/G                                                                | De acuerdo    | 80,0% |
| D                                                                   | De acuerdo    | 93,3% |
| <b>Prescripción en pacientes con reflujo esofágico</b>              |               |       |
| CS                                                                  | De acuerdo    | 86,7% |

|                                                                                    |               |        |
|------------------------------------------------------------------------------------|---------------|--------|
| G                                                                                  | De acuerdo    | 86,7%  |
| CS/G                                                                               | De acuerdo    | 86,7%  |
| D                                                                                  | En desacuerdo | 60,0%  |
| <b>Prescripción en pacientes con ERC leve</b>                                      |               |        |
| CS                                                                                 | En desacuerdo | 66,7%  |
| G                                                                                  | En desacuerdo | 73,3%  |
| CS/G                                                                               | En desacuerdo | 66,7%  |
| D                                                                                  | En desacuerdo | 80,0%  |
| <b>Prescripción en pacientes con ERC moderada</b>                                  |               |        |
| CS                                                                                 | En desacuerdo | 86,7%  |
| G                                                                                  | En desacuerdo | 80,0%  |
| CS/G                                                                               | En desacuerdo | 86,7%  |
| D                                                                                  | En desacuerdo | 93,3%  |
| <b>Prescripción en pacientes con ERC grave</b>                                     |               |        |
| CS                                                                                 | En desacuerdo | 86,7%  |
| G                                                                                  | En desacuerdo | 93,3%  |
| CS/G                                                                               | En desacuerdo | 86,7%  |
| D                                                                                  | En desacuerdo | 100,0% |
| <b>Uso de SYSADOA en pacientes polimedicados</b>                                   |               |        |
| Que requieren un uso de opioides                                                   | De acuerdo    | 80,0%  |
| Que requieren un uso frecuente de AINEs                                            | De acuerdo    | 86,7%  |
| Que expresan con frecuencia<br>acontecimientos adversos de origen<br>medicamentoso | De acuerdo    | 86,7%  |



|                                                                                          |               |       |
|------------------------------------------------------------------------------------------|---------------|-------|
| Que requieren medicación con ansiolíticos y antidepresivos                               | De acuerdo    | 93,3% |
| Con intolerancia/alergia a medicamentos que contengan como excipiente lactosa o sorbitol | En desacuerdo | 73,3% |
| Con intolerancia/alergia al marisco                                                      | En desacuerdo | 73,3% |

AINes: antiinflamatorios no esteroideos, CS: condroitín sulfato, CS/G: combinación de condroitín sulfato y glucosamina, D: diacereína, DM2: diabetes mellitus tipo 2, ECV: enfermedad cardiovascular, ERC: enfermedad renal crónica, G: glucosamina, HTA: hipertensión arterial, RCV: riesgo cardiovascular
